# Supplementary material for: Software for Administering the National Cancer Institute’s Patient-Reported Outcomes Version of the Common Terminology Criteria for Adverse Events: Usability Study
Source: PubMed Central journal article supplement (PMC6066634; doi:10.2196/10070), 2018-07-16
Supplement: humanfactors_v5i3e10070_app1.pdf [file humanfactors_v5i3e10070_app1.pdf]

**APPENDICES/SUPPLEMENTAL MATERIAL FOR:**

**Usability testing of software for administering the National Cancer Institute's  
Patient-Reported Outcomes version of the Common Terminology Criteria for  
Adverse Events (PRO-CTCAE)**

Martin W. Schoen, MD, MPH, Ethan Basch, MD, MSc, Lori L. Hudson, PhD, Arlene E. Chung, MD, MHA, MMCi, Tito R. Mendoza PhD, Sandra A. Mitchell PhD, CNRP, Diane St. Germain, RN, MS, Paul Baumgartner, MS, Laura Sit, MS, Lauren J. Rogak, MA, Marwan Shouery, MS, Eve Shalley, BA, Bryce B. Reeve, PhD, Maria R. Fawzy, MHA, Nrupen A. Bhavsar, PhD, Charles Cleeland, PhD, Deborah Schrag, MD, MPH, Amylou C. Dueck, PhD, Amy P. Abernethy, MD, PhD

Correspondence to:

Ethan Basch, MD  
University of North Carolina  
170 Manning Drive  
Chapel Hill, NC 27516  
ebasch@med.unc.edu  
919-843-3055

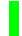

## Multimedia Appendices

**eTable 1** – Usability domains used to define the PRO-CTCAE system

| Usability Domains            | Definition                                                                                                                                                    |
|------------------------------|---------------------------------------------------------------------------------------------------------------------------------------------------------------|
| Ease of learning             | How fast can someone unfamiliar with the user interface learn it sufficiently well to accomplish basic tasks?                                                 |
| Efficiency of use            | How fast can an experienced user accomplish tasks?                                                                                                            |
| Memorability                 | If someone has used the system before, can they remember enough to use it effectively the next time or do they have to relearn some or all of its components? |
| Error frequency and severity | How often do users make errors while using the system, how serious are these errors, and how do users recover from these errors?                              |
| Subjective satisfaction      | How much does the user like using the system?                                                                                                                 |

**eTable 2.** Tasks included in the evaluation of the patient portal and professional interface.

| Task                                    | Description                                                              |
|-----------------------------------------|--------------------------------------------------------------------------|
| <b>Patient System</b>                   |                                                                          |
| Log into system                         | Log into system as a patient                                             |
| Select Survey                           | Select a survey to take as a patient                                     |
| Answer survey questions                 | Answer several survey questions, including conditional branching         |
| Add additional symptom                  | Add an additional symptom that a patient could experience                |
| Log out of system                       | Log out of the system                                                    |
| <b>Professional System</b>              |                                                                          |
| Log into system                         | Log into system as a professional                                        |
| Create Form                             | Create a survey form                                                     |
| Name Form & add “palpitations”          | Name form and add the symptom “palpitations”                             |
| Add category of symptoms                | Add a separate category of symptoms                                      |
| Add two additional symptoms             | Add additional symptoms to survey                                        |
| Generate schedule for form              | Generate a schedule for form administration                              |
| Monitor Forms                           | Monitor the form administration to patient users                         |
| Determine the number of forms scheduled | Determine the number of forms that had been scheduled for a patient used |
| How Easy Was it to Reschedule?          | Report user ease with rescheduling forms for a patient user              |

|             |                                                     |
|-------------|-----------------------------------------------------|
| View Report | View reports generated from patient user responses  |
| View Alert  | View clinical alert that was triggered by a patient |
| Clear Alert | Clear and managed an alert that was triggered       |

**eTable 3.** Patient user demographics.

| Characteristics     |                                                  | Clinic-Based Testing     |                          | Remote Testing                          |                                | Total<br>n=169<br>n (%) |
|---------------------|--------------------------------------------------|--------------------------|--------------------------|-----------------------------------------|--------------------------------|-------------------------|
|                     |                                                  | Round 1<br>n=36<br>n (%) | Round 2<br>n=44<br>n (%) | Web-based<br>interface<br>n=44<br>n (%) | IVR<br>system<br>n=45<br>n (%) |                         |
| <b>Age (years)</b>  |                                                  |                          |                          |                                         |                                |                         |
|                     | Mean (SD)                                        | 51.6 (4.6)               | 53.8 (3.7)               | 51.3 (3.9)                              | 55.4<br>(4.1)                  | 53.0 (2.0)              |
|                     | >65 years old                                    | 6 (17)                   | 8 (18)                   | 7 (16)                                  | 10 (22)                        | 31 (18)                 |
| <b>Sex</b>          |                                                  |                          |                          |                                         |                                |                         |
|                     | Female                                           | 21 (59)                  | 23 (52)                  | 23 (52)                                 | 25 (57)                        | 92 (54)                 |
| <b>Race</b>         |                                                  |                          |                          |                                         |                                |                         |
|                     | White                                            | 29 (81)                  | 28 (64)                  | 29 (66)                                 | 28 (62)                        | 114 (67)                |
|                     | Asian                                            | 1 (3)                    | 2 (5)                    | 3 (7)                                   | 0 (0)                          | 6 (4)                   |
|                     | Black                                            | 3 (8)                    | 10 (23)                  | 11 (25)                                 | 17 (38)                        | 41 (24)                 |
|                     | Other/multiple<br>race                           | 3 (8)                    | 3 (7)                    | 1 (2)                                   | 0 (0)                          | 7 (4)                   |
| <b>Ethnicity</b>    |                                                  |                          |                          |                                         |                                |                         |
|                     | Hispanic                                         | 3 (8)                    | 5 (11)                   | 6 (14)                                  | 3 (7)                          | 17 (10)                 |
| <b>Education</b>    |                                                  |                          |                          |                                         |                                |                         |
|                     | High School or<br>Less                           | 7 (19)                   | 11(25)                   | 11 (25)                                 | 15 (33)                        | 44 (26)                 |
|                     | Some College or<br>College Degree/<br>Equivalent | 19 (53)                  | 25 (59)                  | 25 (57)                                 | 22 (49)                        | 91 (54)                 |
|                     | Graduate<br>Education                            | 10 (27)                  | 7 (16)                   | 8 (17)                                  | 8 (18)                         | 33 (20)                 |
| <b>Computer use</b> |                                                  |                          |                          |                                         |                                |                         |
|                     | Not comfortable<br>or rarely use<br>computers    | 6 (17)                   | 8 (19)                   | 6 (14)                                  | 11 (24)                        | 31 (19)                 |
|                     | Comfortable<br>checking email                    | 6 (17)                   | 9 (21)                   | 7 (16)                                  | 15 (33)                        | 37 (22)                 |
|                     | Regularly use<br>computers                       | 24 (66)                  | 26 (60)                  | 31 (70)                                 | 19 (42)                        | 100 (59)                |

**eTable 4.** Professional user demographics.

| <b>Characteristics</b>   |                                         | <b>Round 1<br/>n=20<br/>n (%)</b> | <b>Round 2<br/>n=27<br/>n (%)</b> | <b>Total<br/>n=47<br/>n (%)</b> |
|--------------------------|-----------------------------------------|-----------------------------------|-----------------------------------|---------------------------------|
| <b>Age</b>               |                                         |                                   |                                   |                                 |
|                          | Mean (SD)                               | 39.6 (6.5)                        | 35 (4.3)                          | 37 (5.2)                        |
| <b>Sex</b>               |                                         |                                   |                                   |                                 |
|                          | Female                                  | 16 (80)                           | 19 (70)                           | 35 (74)                         |
| <b>Race</b>              |                                         |                                   |                                   |                                 |
|                          | White                                   | 14 (70)                           | 18 (67)                           | 32 (68)                         |
|                          | Asian                                   | 4 (20)                            | 5 (19)                            | 9 (19)                          |
|                          | Black                                   | 0 (0)                             | 3 (11)                            | 3 (6)                           |
|                          | Other/multiple race                     | 2 (10)                            | 1 (4)                             | 3 (6)                           |
| <b>Ethnicity</b>         |                                         |                                   |                                   |                                 |
|                          | Hispanic                                | 2 (10)                            | 1 (4)                             | 3 (6)                           |
| <b>Education</b>         |                                         |                                   |                                   |                                 |
|                          | High School Graduate                    | 0 (0)                             | 1 (4)                             | 1 (2)                           |
|                          | Some College or College Degree          | 9 (45)                            | 10 (37)                           | 9 (40)                          |
|                          | Graduate Education                      | 11 (55)                           | 16 (59)                           | 25 (57)                         |
| <b>Computer use</b>      |                                         |                                   |                                   |                                 |
|                          | Not comfortable or rarely use computers | 0 (0)                             | 0 (0)                             | 0 (0)                           |
|                          | Comfortable checking email              | 0 (0)                             | 0 (0)                             | 0 (0)                           |
|                          | Regularly use computer                  | 20 (100)                          | 27 (100)                          | 47 (100)                        |
| <b>Professional role</b> |                                         |                                   |                                   |                                 |
|                          | Research Associate                      | 6 (30)                            | 17 (63)                           | 23 (49)                         |
|                          | Nurse                                   | 7 (35)                            | 5 (19)                            | 12 (26)                         |
|                          | Physician                               | 7 (35)                            | 5 (19)                            | 12 (26)                         |

**eTable 5.** Patients' qualitative comments about the system.

| Comment Categories                                       | Clinic-based Testing     |                          | Remote Testing                       |                             | Total Patients<br>n=169<br>n (%) |
|----------------------------------------------------------|--------------------------|--------------------------|--------------------------------------|-----------------------------|----------------------------------|
|                                                          | Round 1<br>n=36<br>n (%) | Round 2<br>n=44<br>n (%) | Web-based interface<br>n=44<br>n (%) | IVR system<br>n=45<br>n (%) |                                  |
| Total comments                                           | 175                      | 303                      | 302                                  | 407                         | 1187                             |
| Positive comments                                        | 90 (51)                  | 217 (71)                 | 230 (76)                             | 302 (74)                    | 839 (71)                         |
| Neutral comments                                         | 6 (4)                    | 35 (12)                  | 37 (12)                              | 39 (10)                     | 117 (10)                         |
| Negative comments                                        | 79 (45)                  | 51 (17)                  | 35 (12)                              | 66 (16)                     | 231 (19)                         |
| <b>Negative Comment Categories</b>                       |                          |                          |                                      |                             |                                  |
| Visibility of system status                              | 6 (3.4)                  | 1 (0.3)                  | 2 (0.7)                              | 15 (3.7)                    | 24 (2.0)                         |
| Match between the system and the real world <sup>a</sup> | 15 (8.6)                 | 6 (2.0)                  | 4 (1.3)                              | 7 (1.7)                     | 32 (2.7)                         |
| User control and freedom                                 | 2 (1.1)                  | 2 (0.6)                  | 2 (0.7)                              | 9 (2.1)                     | 15 (1.3)                         |
| Consistency and standards                                | 3 (1.7)                  | 4 (1.3)                  | 1 (0.3)                              | 1 (0.3)                     | 9 (0.8)                          |
| Flexibility and efficiency of use                        | 4 (2.9)                  | 2 (0.7)                  | 1 (0.3)                              | 8 (2.0)                     | 16 (1.4)                         |
| Aesthetic and minimalist design                          | 3 (1.7)                  | 5 (1.7)                  | 0 (0)                                | 0 (0)                       | 8 (0.7)                          |
| Disability accommodation                                 | 6 (3.4)                  | 10 (3.3)                 | 4 (1.3)                              | 5 (1.2)                     | 25 (2.1)                         |
| Password problem                                         | 2 (1.1)                  | 1 (0.3)                  | 2 (0.7)                              | 4 (1.0)                     | 9 (0.8)                          |
| Difficulty finding site, URL problem, browser error      | 16 (9.1)                 | 5 (1.7)                  | 8 (2.7)                              | NA                          | 29 (2.4)                         |
| User error                                               | 8 (4.6)                  | 6 (2.0)                  | 3(1.0)                               | 2 (0.5)                     | 19 (1.6)                         |

<sup>a</sup>Defined as functionality intuitively matching the intended function.

**eTable 6** Professionals' qualitative comments about the system

| <b>Comment Categories</b>                                | <b>Round 1<br/>n= 20<br/>n (%)</b> | <b>Round 2<br/>n= 27</b> | <b>Total<br/>n= 47</b> |
|----------------------------------------------------------|------------------------------------|--------------------------|------------------------|
| Total Comments                                           | 141                                | 111                      | 252                    |
| <b>Negative comment categories</b>                       |                                    |                          |                        |
| Visibility of system status                              | 2 (1.4)                            | 5 (4.5)                  | 7 (2.8)                |
| Match between the system and the real world <sup>a</sup> | 20 (14)                            | 6 (5.4)                  | 26 (10)                |
| User control and freedom                                 | 12 (8.5)                           | 4 (3.6)                  | 16 (6.3)               |
| Consistency and standards                                | 17 (12)                            | 19 (17.1)                | 36 (14)                |
| Error prevention                                         | 6 (4.3)                            | 10 (9.0)                 | 16 (6)                 |
| Recognition rather than recall                           | 22 (16)                            | 12 (11)                  | 34 (14)                |
| Flexibility and efficiency of use                        | 25 (18)                            | 26 (23)                  | 51 (20)                |
| Aesthetic and minimalist design                          | 24 (17)                            | 12 (11)                  | 26 (14)                |
| Help users recognize, diagnose, and recover from errors  | 4 (2.8)                            | 1 (0.9)                  | 5 (2.0)                |
| Help and documentation                                   | 3 (2.1)                            | 10 (9.0)                 | 13 (5.2)               |
| Password problem                                         | 1 (0.7)                            | 4 (3.6)                  | 5 (2.0)                |
| Difficulty finding site, URL problem, browser error      | 3 (2.1)                            | 1 (0.9)                  | 4 (1.6)                |
| User error                                               | 1 (0.7)                            | 1 (0.9)                  | 2 (0.8)                |

<sup>a</sup>Defined as functionality intuitively matching the intended function.
